# Supplementary material for: Alterations in Th17 Cells and Non-Classical Monocytes as a Signature of Subclinical Coronary Artery Atherosclerosis during ART-Treated HIV-1 Infection
Source: MDPI journal article supplement (doi:10.3390/cells13020157), 2024-01-15
Supplement: s1 [file s1]

**Supplemental Table 1: Antibodies and dyes used for polychromatic flow cytometry**

| Target                                  | Clone      | Fluorochrome     | Supplier                 |
|-----------------------------------------|------------|------------------|--------------------------|
| <b>Th17/Treg cocktail</b>               |            |                  |                          |
| CD3                                     | UCHT1      | Alexa Fluor 700  | Biolegend                |
| CD4                                     | RPA-T4     | PerCP/Cyanine5.5 | Biolegend                |
| CD45RA                                  | HI100      | APC-eFluor 780   | eBioscience              |
| CCR6                                    | 11A9       | PE               | BD Pharmingen            |
| CCR7                                    | 3D12       | BV786            | BD Horizon               |
| CD25                                    | M-A251     | BV421            | BD Horizon               |
| CD127                                   | HIL-7R-M21 | PE-Cy7           | BD Pharmingen            |
| CD26                                    | M-A261     | APC              | BD Pharmingen™           |
| CD161                                   | DX12       | BV650            | BD Horizon               |
| FOXP3                                   | PCH101     | Alexa Fluor 488  | eBioscience              |
| LIVE/DEAD™ Fixable Aqua Dead Cell Stain |            |                  | Thermo Fisher Scientific |
| <b>Monocyte cocktail</b>                |            |                  |                          |
| CD3                                     | UCHT1      | Alexa Fluor 700  | Biolegend                |
| CD4                                     | RPA-T4     | PerCP/Cyanine5.5 | Biolegend                |
| CD1c                                    | F10/21A3   | BV786            | BD OptiBuild             |
| CD14                                    | M5E2       | APC              | BD Pharmingen            |
| CD16                                    | 3G8        | PE-Cy7           | BD Pharmingen            |
| HLA-DR                                  | L243       | APC/Cyanine7     | Biolegend                |
| CCR6                                    | 11A9       | PE               | BD Pharmingen            |
| M-DC8/Slan                              | DD-1       | FITC             | Miltenyi                 |
| CCR2                                    | K036C2     | PE/Dazzle 594    | Biolegend                |
| CX3CR1                                  | 2A9-1      | BV421            | BD Horizon               |
| LIVE/DEAD™ Fixable Aqua Dead Cell Stain |            |                  | Thermo Fisher Scientific |
| <b>Monocyte and DC cocktail</b>         |            |                  |                          |
| CD3                                     | UCHT1      | Alexa Fluor 700  | Biolegend                |
| CD4                                     | RPA-T4     | PerCP/Cyanine5.5 | Biolegend                |
| CD1c                                    | F10/21A3   | BV786            | BD OptiBuild             |
| CD14                                    | M5E2       | APC              | BD Pharmingen            |
| CD16                                    | 3G8        | PE-Cy7           | BD Pharmingen            |
| HLA-DR                                  | L243       | APC/Cyanine7     | Biolegend                |
| CCR6                                    | 11A9       | BV421            | BD Horizon               |
| CCR9                                    | 112509     | PE               | BD Pharmingen            |
| CD123                                   | 6H6        | PE/Dazzle 594    | eBioscience              |
| CD303 (BDCA2)                           | AC144      | FITC             | Miltenyi                 |
| LIVE/DEAD™ Fixable Aqua Dead Cell Stain |            |                  | Thermo Fisher Scientific |
