# Supplementary material for: Alterations in Th17 Cells and Non-Classical Monocytes as a Signature of Subclinical Coronary Artery Atherosclerosis during ART-Treated HIV-1 Infection
Source: Cells. 2024 Jan 15;13(2):157. doi: 10.3390/cells13020157 (PMC10813976; doi:10.3390/cells13020157)
Supplement: Supplementary file 1 [file cells-13-00157-s001.zip › TRWS Suppl Files 2024-01-04/TRWS Supplemental File 1.xlsx]

## Sheet: subset freq of parent
																										CD4+ T cells
			Frequency within Live	Frequency is within T cells		Frecuency within CD4+T cells										Frequency within CD4- T cells										Frequency within Memory (Individual expression)			Frequency within Memory (combined expression)								Frequency within CD25+ Tregs (Individual expression)					Frequency within CD25+ Tregs (combined expression)
Donor ID	HIV status	CVD status	1 T cells	2 CD4+	139 CD4-	9 Tregs	28 Memory	40 CD25+ Tregs	58 EM	70 EM Tregs	82 Naive	83 TCM	95 TCM Tregs	107 EMRA	119 EMRA Tregs	146 Tregs	165 Memory	177 CD25+ Tregs	195 EM	207 EM Tregs	219 Naive	220 TCM	232 TCM Tregs	244 EMRA	256 EMRA Tregs	286 Memory /CCR6	287 Memory /CD26	288 Memory /CD161	289 Memory /CCR6+CD26+CD161+	290 Memory /CCR6+CD26+CD161-	291 Memory /CCR6+CD26-CD161+	292 Memory /CCR6+CD26-CD161-	293 Memory /CCR6-CD26+CD161+	294 Memory /CCR6-CD26+CD161-	295 Memory /CCR6-CD26-CD161+	296 Memory /CCR6-CD26-CD161-	297CD25+ Tregs/CCR6	298CD25+ Tregs/CCR7	299CD25+ Tregs/CD26	300CD25+ Tregs/CD45RA	301CD25+ Tregs/CD161	302CD25+ Tregs/CCR6+CD26+CD161+	303CD25+ Tregs/CCR6+CD26+CD161-	304CD25+ Tregs/CCR6+CD26-CD161+	305CD25+ Tregs/CCR6+CD26-CD161-	306CD25+ Tregs/CCR6-CD26+CD161+	307CD25+ Tregs/CCR6-CD26+CD161-	308CD25+ Tregs/CCR6-CD26-CD161+	309CD25+ Tregs/CCR6-CD26-CD161-
102002	1	2	70	36.9	63.1	4.57	59.5	3.63	30.1	3.07	32.8	29.4	1.34	3.09	0.035	0.44	41.7	0.17	27.6	0.13	40.5	14.1	0.17	17.3	0.03	23	71.8	34.6	8.1	8.27	3.31	3.31	17.9	37.6	5.34	16.2	22.2	30.3	29.7	2.54	19.2	2.86	5.71	2.38	11.3	4.44	16.7	9.52	47.1
102005	1	1	77.7	56.9	43.1	5.52	39.8	3.44	12	2.17	46	27.7	1.83	8.74	0.55	0.14	52.4	0.039	29	0.071	28.2	23.4	0.043	19.2	0.019	13	76.8	40.1	6.72	3.96	0.99	1.36	25.8	40.4	6.64	14.2	16	51.9	42	20.4	12.8	2.07	4.17	1.94	7.85	3.72	32.1	5.04	43.2
102006	1	2	46.3	51.4	48.6	11	56.5	8.27	24	6.87	26	32.5	3.27	6.5	0.44	0.61	48.6	0.13	36	0.41	37.3	12.6	0.11	13.5	0.062	21.9	80.1	34.4	8.53	10.5	1	1.92	20.7	40.4	4.18	12.8	20.6	32.5	36.9	7.88	7.91	1.56	6.17	1.7	11.1	2.24	26.9	2.41	47.9
104004	1	1	67.2	34.4	65.6	19.7	52.4	13.2	23.3	13.4	24.2	29	5.36	3.71	0.39	0.34	52.6	0.25	24.8	0.13	35.6	27.8	0.17	11.4	0.018	15.3	74.6	17	3.79	8.06	1.22	2.28	7.96	54.8	4.06	17.8	18	31.7	32.5	4.34	7.54	0.51	4.28	1.53	11.7	1.16	26.5	4.34	50
104007	1	2	86	60.1	39.9	2.58	39	1.92	17.9	1.43	53.3	21.1	0.99	5.04	0.039	0.16	25.8	0.056	14.6	0.032	50.4	11.2	0.079	23.7	0.00803	20.9	64.5	16.8	6.23	10.6	1.26	2.76	6.21	41.4	3.14	28.3	32.8	72.4	35.8	4.06	10.5	1.89	9.41	3.12	18.4	2	22.5	3.51	39.2
104011	1	1	79.6	57.2	42.8	12.9	43.7	10.5	23	8.22	36.2	20.7	3.92	7.17	0.33	0.54	29.8	0.44	19.2	0.22	41.7	10.6	0.29	28	0.018	15.6	57.7	19.8	3.22	7.44	1.22	3.73	9.15	37.9	6.26	31.1	14.1	31.7	23.4	5.25	7.72	0.72	2.86	1.31	9.19	1.34	18.5	4.35	61.8
104013	1	1	73	37.7	62.3	10.3	61.8	8.08	22.4	5.38	23.7	39.4	4.53	4.12	0.11	0.27	45	0.14	24.4	0.053	32.7	20.6	0.12	22.1	0.056	13.5	74.1	24.4	4.44	6.88	0.85	1.37	14.2	48.5	4.9	18.8	14.5	45.7	24.4	3.2	8	0.88	2.88	1.42	9.28	1.46	19.2	4.24	60.7
104021	1	1	91.7	57.2	42.8	9.46	72.9	7.71	16.7	3.83	16.1	56.2	5.06	1.58	0.15	0.47	62.9	0.21	26	0.17	25	36.9	0.24	11.6	0.018	38.7	86.2	28.2	11.7	21	1.32	4.65	13.9	39.5	1.27	6.59	33.4	58.6	40.2	6.1	13.6	3.1	10.7	2.64	17	3.07	23.4	4.78	35.4
104025	1	1	84.5	22.7	77.3	11.6	54.5	8.44	21.1	4.79	27.6	33.4	5.21	6.28	0.59	0.088	38.1	0.032	17.8	0.00633	31.8	20.3	0.036	30	0.025	22.7	73.1	23.8	5.72	11	1.57	4.42	13.6	42.8	2.86	18.1	14.6	54.2	47.6	12.2	6.74	0.95	5.39	0.87	7.36	2.29	39	2.62	41.6
104026	1	1	77.5	49.2	50.8	9.18	56.2	7.61	26.6	4.34	26.1	29.6	4	8.53	0.36	0.41	39.6	0.18	20.1	0.11	28.8	19.5	0.17	31.2	0.075	13.8	46.9	20.7	2.63	4.88	1.75	4.52	6.52	32.9	9.84	37	23.5	49.9	29.7	8.53	8.36	0.86	4.71	2.73	15.2	1.38	22.8	3.39	48.9
104028	1	2	70.7	36.4	63.6	17.3	69	8.76	34.9	9.48	8.34	34.1	6.66	5.39	0.41	0.13	44.4	0.05	19.6	0.021	32.3	24.7	0.058	23.2	0.016	24.9	50.3	21.6	6.58	10.7	2.3	5.36	6.69	26.3	6.08	36	28.3	45.4	30.3	7.1	9.61	1.49	7.29	2.78	16.8	1.22	20.2	4.12	46.1
104029	1	2	69.8	59.2	40.8	9.96	64	7.9	23.1	5.26	22.1	40.9	3.65	4	0.27	0.4	31.1	0.17	15.4	0.077	36.6	15.8	0.21	31.9	0.057	42.5	69.6	21.2	7.93	21.2	4.71	8.7	6.14	34.4	2.43	14.6	33.5	40.1	32.4	9.85	6.47	1.29	9.2	2.12	20.9	1.29	20.6	1.76	42.8
104034	1	1	69.8	35.2	64.8	3.86	74.7	3.09	42.7	2.02	17.6	32.1	1.64	3.86	0.083	0.21	50.3	0.079	28.7	0.068	27.2	21.6	0.085	22.3	0.019	16.3	60.3	22.3	5.35	8.59	0.75	1.59	10.9	35.4	5.27	32.1	20.7	51.1	41	4.53	9.44	1.94	7.49	1.94	9.34	2.31	29.2	3.24	44.5
104035	1	2	61.4	19.9	80.1	8.97	73.3	6.69	45.2	5.85	12.6	28.2	2.6	5.13	0.27	0.28	49.1	0.13	27.4	0.089	24	21.7	0.12	26.5	0.035	20.4	61.5	35	7.25	8.09	2.48	2.63	14.7	31.5	10.5	22.9	21.7	34.1	15.4	4.16	11.3	0.48	3.14	3.07	15	0.96	10.9	6.76	59.7
104036	1	1	75.5	64.3	35.7	6.85	43.8	4.68	17.9	2.13	43.3	25.9	3.43	6.08	0.3	0.68	43.6	0.28	21.1	0.21	31.5	22.6	0.3	24.2	0.072	16.9	57.7	26	4.6	6	1.71	4.64	12.8	34.3	6.85	29.1	16	68.3	36.2	19.7	6.43	0.96	4.17	1.13	9.77	1.89	29.2	2.45	50.5
104038	1	1	92.7	33	67	8.24	62.1	4.12	28	4.6	21.3	34.1	2.92	8.36	0.41	0.22	62.5	0.16	30.5	0.1	19.9	32	0.065	17.4	0.032	9.6	63.7	31.8	3.07	3.82	0.98	1.73	18.5	38.3	9.2	24.4	10.8	38.9	32.5	5.36	14.7	1.69	3.43	1.44	4.27	4.21	23.2	7.34	54.4
104039	1	2	62.9	37.9	62.1	5.6	67	4.16	32.2	2.71	19	34.8	2.53	8.42	0.18	0.32	61.1	0.24	31.9	0.072	24.5	29.1	0.2	14.1	0.015	15.9	49.5	26.9	6.63	5.31	1.55	2.44	11.6	25.9	7.11	39.4	25.2	50.9	32.3	4.44	18.8	3.8	5.63	4.89	10.8	3.59	19.3	6.48	45.5
104040	1	2	85.4	47.5	52.5	7.41	62.6	5.47	30.8	4.75	23.1	31.8	2.18	6.88	0.24	0.42	53.9	0.21	29.8	0.15	23	24.1	0.15	22.7	0.07	15.7	67.3	29.8	5.14	7.13	1.43	2.04	14.6	40.5	8.65	20.5	16.9	32.4	25.4	6.81	7.41	0.66	2.94	1.62	11.7	1.6	20.2	3.52	57.7
104044	1	1	73.6	28.7	71.3	6.1	64.8	3.82	45.3	4.13	16.4	19.5	1.42	12.7	0.36	0.043	38	0.028	19.4	0.00838	26.6	18.6	0.026	35.4	0.00291	9.79	35.1	21.4	1.9	3.22	1.22	3.44	7.94	22	10.3	49.9	19	28.5	20.6	5.95	7.23	0.78	2.18	1.71	14.3	0.69	17	4.05	59.3
104045	1	1	93.7	27.2	72.8	10.9	74.8	8.39	26.7	5.21	12.6	48.1	5.53	1.71	0.044	0.13	77.9	0.094	34.3	0.024	13.6	43.6	0.099	8.43	0.000712	23.9	67.1	24.8	8.25	9.93	2.66	3.02	9.38	39.6	4.5	22.7	28.9	52.9	39.2	1.52	11.8	3.39	8.15	3.44	13.9	2.25	25.5	2.71	40.7
104052	1	1	59.4	43.9	56.1	6.69	38	5.28	14.2	3.67	43.7	23.8	2.26	11.6	0.21	0.51	33.5	0.32	20.7	0.15	52.5	12.8	0.27	13.4	0.027	22.9	65.1	22.4	4.78	9.91	3.07	5.13	9.2	41.2	5.36	21.3	30.6	37.9	31.7	8.14	11	1.51	7.72	2.53	18.9	2.11	20.4	4.82	42.1
104056	1	2	74.3	34.1	65.9	7.53	57.9	6.45	33	5.09	27.6	24.8	1.75	6.98	0.29	0.74	66	0.57	32.5	0.22	19.8	33.5	0.42	13.5	0.03	15.1	70.7	33.2	6.11	5.2	1.55	2.22	18.2	41.2	7.34	18.2	16.8	29.6	34.3	9.05	10.7	0.85	3.35	2.4	10.2	2.69	27.4	4.71	48.4
104058	1	1	69.8	45	55	7.15	77.6	4.7	41.9	4.19	12.9	35.7	2.69	2.41	0.11	0.19	48.8	0.074	23.1	0.05	23.1	25.7	0.094	27.9	0.03	13.6	59.7	34.7	6.25	4.33	1.14	1.89	19.2	29.9	8.09	29.2	17.2	41.9	21.5	3.77	11.2	1.59	2.52	2.64	10.4	1.92	15.5	5.04	60.4
104065	1	1	84.5	40.2	59.8	14.2	59.7	9.42	23.6	8.53	22.2	36.1	5.11	3.94	0.26	0.9	71.7	0.46	40.8	0.45	13.2	30.9	0.41	14.2	0.031	14	73.1	22.5	4.84	6.03	1.52	1.65	10.9	51.4	5.24	18.5	21.1	37.2	25.9	3.31	15.5	1.78	4.53	3.25	11.5	3.12	16.4	7.35	52
104066	1	1	79.7	44.9	55.1	7.06	47.2	5.05	17.2	4.03	39	30	2.53	6.75	0.18	0.1	73.6	0.055	40.8	0.033	15.6	32.8	0.06	10.7	0.00399	14.4	77.4	24	5.8	6.13	1.01	1.48	13.3	52.3	3.89	16.2	22.4	39.7	33.6	5.76	10.9	1.86	4.99	2.35	13.2	2.47	24.2	4.26	46.7
104068	1	1	76.1	33.5	66.5	10.5	66.4	7.57	28.3	6.12	18.9	38	4.1	4.2	0.13	0.17	76	0.12	51.3	0.067	10.2	24.7	0.092	13.6	0.011	24.2	69.2	29.5	8.9	11.2	1.81	2.32	13	36.1	5.81	20.8	21.9	39.4	18.4	1.82	8.75	1.19	2.31	2.92	15.5	1.16	13.8	3.49	59.7
104071	1	1	68.5	53.6	46.4	7.59	39.5	5.88	18.5	3.9	46.1	21	2.34	6.77	0.37	0.23	44.6	0.07	29.1	0.095	39.5	15.6	0.083	15.7	0.017	26.7	67.8	22.4	7.36	13.1	2.56	3.69	7.44	39.9	5.04	20.9	26.4	43.6	38.9	18.4	8.16	1.54	7.44	2.38	15	1.57	28.3	2.67	41.1
104073	1	1	62.7	57.5	42.5	8.59	67.9	6.12	29.3	4.67	20.1	38.6	3.15	3.38	0.29	0.37	66.9	0.2	43.4	0.18	23.5	23.5	0.15	9.22	0.016	17.2	81	34.1	7.85	7.05	0.91	1.41	21.9	44.2	3.44	13.2	17.3	42.9	40.5	9.69	7.33	1.31	5.33	1.27	9.36	1.89	32	2.86	46
104079	1	1	73.2	42.6	57.4	6.68	71.8	4.78	39.2	4.14	18.5	32.6	2.35	3.08	0.077	0.28	46.7	0.14	24.9	0.098	24.1	21.8	0.14	28.9	0.027	17.8	63.8	21.7	6.73	7.96	0.64	2.44	10.5	38.6	3.83	29.3	23.6	37.6	31.9	2.9	9.38	1.54	4.58	2.8	14.7	1.85	23.9	3.18	47.4
104084	1	2	72.1	29.9	70.1	5.46	60.5	4.07	34.2	3.66	25.5	26.2	1.54	8.55	0.18	0.25	43.3	0.2	22.3	0.063	27.5	21	0.17	28.9	0.00735	18.4	55.8	30	6.84	6.39	2.04	3.08	11.8	30.8	9.34	29.7	28.7	33.1	15.5	2.36	11	1.98	3.67	3.71	19.4	1.2	8.61	4.13	57.3
106006	1	1	79.6	23.3	76.7	11.9	60.7	9.19	28.7	7.76	20.5	32	3.51	6.94	0.22	0.2	35.2	0.07	21.9	0.075	28.1	13.3	0.048	36.5	0.043	10.4	63.3	24.7	2.71	4.06	1.22	2.4	13.9	42.6	6.83	26.3	10.7	30.5	33.4	4.37	8.51	0.84	2.76	0.78	6.29	3.18	26.7	3.71	55.8
106008	1	2	86.5	51	49	6.61	65.2	4.73	31.7	3.44	24.4	33.5	2.44	3.76	0.21	0.66	58.3	0.42	31	0.23	26.8	27.3	0.32	14.3	0.042	23.4	85.1	29.6	7.97	11.9	0.8	2.73	19.2	46	1.6	9.82	17.8	43.4	35.8	11.4	7.74	0.86	5.09	1.2	10.7	1.97	27.9	3.72	48.6
106011	1	1	63.3	38.6	61.4	11.2	31.5	9.28	9.2	5.66	52.5	22.3	3.16	4.81	0.64	0.51	17.2	0.22	10.3	0.073	44.5	6.9	0.13	37.8	0.14	17.4	82.8	25.2	5.85	8.03	1.54	1.96	14.8	54.1	3.03	10.7	17.1	42	47.1	21.2	8.39	1.13	6.01	1.17	8.77	2.65	37.3	3.44	39.5
106015	1	2	83.7	12.9	87.1	10.9	65.9	8.86	34.2	7.61	7.76	31.7	2.91	15.5	0.15	0.29	34	0.13	14.2	0.056	31.3	19.8	0.14	34.4	0.048	30.2	64.5	19.4	6.17	16.1	2.02	5.9	7.65	34.5	3.55	24.1	38.9	27.2	19.6	1.9	7.21	0.88	7.59	3.67	26.8	0.38	10.7	2.28	47.7
106020	1	1	77.9	54.2	45.8	5.56	65.4	3.78	31.5	3.11	24.9	33.9	1.93	4.13	0.19	0.54	67.4	0.23	37.2	0.19	17.6	30.2	0.3	14.5	0.019	18.3	76.6	25.4	7.73	7.7	1.06	1.84	13.7	47.5	2.83	17.6	26.4	40.9	61.6	10.7	11.9	3.07	10.6	3.28	9.43	3.63	44.3	1.96	23.7
106034	1	1	79.4	43.5	56.5	7.86	45.2	5.68	15.2	3.88	40	30	3.11	6.89	0.23	1.01	69.2	0.5	34.5	0.38	18.4	34.8	0.5	11.4	0.059	14.7	77.6	24	5.39	6.48	1.09	1.75	13.8	51.8	3.69	15.9	19.7	46.8	40.8	9.43	12.6	2.06	6.5	1.98	9.19	2.69	29.6	5.86	42.2
106037	1	1	55.5	23	77	11.6	60.7	8.53	30.9	7.41	20.4	29.8	4	7.37	0.095	0.66	69.1	0.25	34.2	0.3	12.5	34.9	0.26	17.8	0.043	19.7	53.2	33.6	5.41	6.35	3.61	4.29	10.9	30.5	13.7	25.2	32	33.6	13.9	1.3	18.6	1.12	4.09	6.32	20.4	0.93	7.81	10.2	49.1
106038	1	1	66.5	43.9	56.1	4.81	52.1	3.82	25.5	2.82	33.9	26.6	1.49	9.21	0.2	0.51	67.9	0.14	31.7	0.13	18.2	36.2	0.25	13.3	0.054	21.7	76.7	33.5	10.4	8.01	1.69	1.56	15.3	43	6.11	13.9	29.6	37.8	49.7	8.71	11.4	3.72	9.66	2.22	14	2.77	33.6	2.69	31.4
106039	1	1	85.1	49.5	50.5	5.41	59.3	4.14	29.7	3.38	23.9	29.6	1.53	11.4	0.32	0.2	50.4	0.088	23	0.043	28.7	27.3	0.099	20.7	0.023	13.9	73.6	17.5	3.97	7.74	0.72	1.45	10.4	51.5	2.41	21.8	18.6	34.9	35	6.04	9.54	1.11	4.65	2.39	10.4	2.23	27	3.81	48.4
106040	1	1	62.5	30.9	69.1	14.8	55.1	11.3	31	9.74	25.1	24.1	3.88	5.01	0.39	0.3	44.2	0.14	22	0.051	39.1	22.3	0.17	16.4	0.019	20.9	55.4	23.6	5.46	7.94	3.04	4.46	8.82	33.2	6.29	30.8	26.4	32.3	32.8	9.5	9.24	1.16	6.15	2.94	16.1	1.57	23.9	3.56	44.6
106043	1	1	63.5	34.7	65.3	7.48	63.8	6.29	25.5	3.72	24	38.2	3.43	4.77	0.074	0.22	40.5	0.086	22	0.05	29.5	18.5	0.12	29.8	0.016	15.4	72.2	16.5	2.23	7.23	1.01	4.93	10.5	52.3	2.77	19.1	16.1	48.1	22.3	3.82	7.88	0.47	3.12	1.56	11	1.87	16.8	3.98	61.2
106046	1	1	74.3	31.4	68.6	11.4	42.9	9.74	16.2	4.58	32.9	26.7	4.93	12.8	0.6	0.31	43.5	0.17	18.9	0.034	32.3	24.6	0.19	23.9	0.017	33.6	63.8	20.7	7.5	14.7	2.92	8.45	7.4	34.2	2.84	22	38.7	55.7	33.7	15.5	7.85	2.06	7.69	2.49	26.4	0.92	23	2.38	35
106048	1	1	91	19.1	80.9	12.4	73.9	8.56	31.3	7.33	10.1	42.6	4.56	3.66	0.19	0.7	89.4	0.34	41.4	0.27	4.51	48	0.35	5.4	0.056	12.2	67	21	3.72	5.15	1.38	1.92	9.39	48.7	6.45	23.3	12.5	37.1	33.5	4.09	9.17	0.77	2.76	1.44	7.51	2.32	27.6	4.64	52.9
106057	1	2	69.1	40.5	59.5	5.79	72.8	4.42	31.5	2.36	17.8	41.2	3.12	3.66	0.071	0.27	63.9	0.093	29.1	0.072	21.4	34.8	0.14	14.5	0.016	16	44.4	11	2.16	7.65	1	5.16	4.03	30.5	3.77	45.7	18.3	60.7	29.6	4.49	7.05	0.73	4.59	1.83	11.2	1.3	23	3.18	54.2
106061	1	1	64.5	46.9	53.1	3.7	38.9	2.96	14.7	2.18	46.6	24.2	1.15	10.8	0.17	0.24	20.2	0.065	12.8	0.082	42.7	7.47	0.04	36.8	0.075	21.3	82.4	17.6	4.94	13.5	0.77	2.03	10	53.9	1.89	12.9	18.8	37.1	35.9	7.52	6.17	1.03	6.04	1.74	10	1.22	27.6	2.19	50.1
106065	1	1	83.7	20.7	79.3	8.65	43.7	6.26	18.9	4.42	36.3	24.8	3.07	11.3	0.47	0.18	28.6	0.083	12.5	0.035	32.6	16.1	0.067	38.6	0.034	12.4	61.7	19.6	2.5	5.5	1.33	3.04	8.52	45.2	7.21	26.7	23.9	44.8	28.6	9.01	8.31	0.74	4.7	2.27	16.2	1.29	21.9	4	48.9
106072	1	1	73.5	59	41	7.66	55.5	5.04	24.8	3.58	29.5	30.6	3.5	7.32	0.16	0.37	71.6	0.14	42.8	0.12	16.1	28.8	0.15	11.9	0.058	10.9	57.4	25	3.3	4.19	0.9	2.48	12.7	37.2	8.02	31.2	11.9	52.1	27.8	7.64	5.92	0.31	3.24	0.9	7.43	1.21	23.1	3.5	60.3
106080	1	1	80.1	31.6	68.4	5.55	69.4	3.77	27.6	2.08	20.5	41.8	3.07	4.54	0.11	0.49	62	0.22	30	0.14	20.9	32	0.3	16.6	0.024	14.6	59.6	14.7	2.67	7.1	1.29	3.51	6.85	43	3.86	31.8	25.8	67	45.6	6.13	7.4	1.69	9.83	1.27	13	1.59	32.5	2.85	37.3
106081	1	1	77.4	43.1	56.9	5.9	44.3	3.75	25.4	3.64	46.8	18.9	1.69	2.99	0.13	0.16	60.1	0.058	35.3	0.072	24.4	24.8	0.069	15.3	0.00759	12.4	45.5	19.1	3.22	4.8	1.32	3.08	5.81	31.7	8.78	41.3	36.7	39.2	28.8	9.78	9.78	1.29	6.72	3.71	25	1.02	19.7	3.76	38.8
106082	1	1	71.5	45	55	7.97	46.8	5.38	18.1	4.45	39.5	28.7	2.27	5.69	0.65	0.17	46.6	0.056	25.2	0.059	33.1	21.5	0.062	20.1	0.022	25.9	87.4	33.1	10.9	12.6	1.25	1.18	18	46	2.97	7.16	28.2	36.8	45.5	10.3	8.78	2.44	8.72	2.23	14.8	1.98	32.4	2.14	35.3
106083	1	1	66	22.6	77.4	10.5	58.1	8.85	24.3	6.19	26.9	33.8	3.5	4.53	0.21	0.38	77.5	0.23	46.4	0.14	15.6	31.1	0.15	6.47	0.012	28.8	76.5	34	10.3	11.9	3.06	3.56	16.2	38.1	4.48	12.4	20.4	39	33.5	6.97	8.74	1.95	6.41	1.86	10.2	2.32	22.8	2.6	51.9
106088	1	2	74.3	19.6	80.4	9.54	67.9	7.79	33.3	5.89	15.5	34.6	2.96	7.08	0.3	0.35	36.2	0.23	17.9	0.085	26.6	18.3	0.22	36.8	0.023	23.6	70.2	51.9	15.3	4.45	2.45	1.49	22.8	27.7	11.4	14.4	27.2	37	41.7	7.68	23.9	6.46	4.38	5.75	10.6	4.27	26.6	7.39	34.6
106096	1	1	58	5.88	94.1	28	66	21.7	34.2	18.9	4.06	31.8	8.82	1.98	0.1	3.07	79.2	2.51	47.1	0.87	10.1	32.1	2.04	7.57	0.063	28.9	19.7	44.2	3.15	2.95	16.1	6.76	2.29	11.3	22.7	34.8	32.9	29.7	6.18	0.93	24.1	0.31	1.08	8.96	22.6	0.93	3.86	13.9	48.4
106099	1	2	79.4	31.5	68.5	5.79	52	4.78	20.3	2.62	37.2	31.8	2.62	4.99	0.15	0.073	30.3	0.04	14.6	0.0098	34	15.7	0.042	35.7	0.00392	28.8	66.6	25.4	10.3	12.3	2.93	3.2	7.93	36.1	4.23	23	38	53.5	37.7	7.44	5.88	2.01	12.2	2.36	21.4	0.85	22.6	0.67	37.9
106115	1	2	66.8	35.8	64.2	9.3	56.6	5.4	21.3	4.15	28.3	35.3	4.27	5.84	0.2	0.55	60.6	0.34	30.8	0.2	25.5	29.8	0.28	13.4	0.033	17.4	62.3	48.5	7.3	4.38	2.95	2.78	23.1	27.5	15.1	16.8	18.9	50.7	42.2	13.1	22.5	4.55	6.73	2.55	5.09	4.55	26.4	10.9	39.3
106117	1	2	65	5.21	94.8	15.9	75	11.9	48.3	10.4	4.12	26.8	5.29	4.97	0.11	1.1	87.6	0.78	59	0.39	6.32	28.6	0.68	4.98	0.014	21.8	48.8	26	3.02	6.42	7.48	4.91	4.45	34.9	11	27.8	35.1	32.7	7.58	0.66	19.4	0.66	1.8	9.19	23.4	0.66	4.45	8.91	50.9
106121	1	2	75.8	52.7	47.3	5.51	52.9	4.41	16.3	2.34	35.9	36.6	2.83	5.71	0.078	0.38	63.1	0.24	35	0.13	24.4	28.1	0.19	12.1	0.032	21.3	75.9	27.7	8.99	8.72	1.78	1.79	12	46.2	4.98	15.6	24.8	55.7	37.1	6.07	9.47	2.02	7.05	2.49	13.2	1.81	26.2	3.14	44
106158	2	1	70.9	77.5	22.5	6.79	87.2	4.09	29.2	4.03	5.15	58	2.57	0.9	0.097	0.4	75.2	0.083	38.1	0.16	11	37.1	0.18	13.4	0.031	37.4	89.7	8.6	3.94	32.1	0.26	1.08	3.68	50	0.72	8.2	26.4	37.5	32.9	2.58	3.61	0.68	9.36	1.05	15.3	0.53	22.3	1.35	49.5
106166	2	1	62.8	57.1	42.9	6.77	34.6	5.46	11.7	2.38	52.5	22.9	3.21	6.15	0.3	0.41	58.2	0.28	31.2	0.11	23.9	27	0.25	17.5	0.022	24.1	84.3	23.1	7.64	13.1	1.17	2.22	11.9	51.7	2.35	9.93	19.3	59.2	65.3	17.3	6.46	1.74	9.5	0.77	7.3	2.58	51.5	1.37	25.3
106177	2	1	78.9	69.6	30.4	2.69	19.2	2.4	5.4	0.86	41	13.8	1.64	37.1	0.065	0.25	24.2	0.13	13.7	0.054	35.9	10.6	0.087	39.6	0.051	23.8	59.4	20.6	8.21	10.9	1.46	3.23	8.04	32.3	2.91	33	32.3	66.2	18.5	3.37	4.89	0.59	5.88	2.51	23.3	0.33	11.7	1.45	54.3
106183	2	1	73.1	59.7	40.3	4.05	83.2	3.03	46	2.44	6.87	37.2	1.42	5.92	0.13	0.31	37.8	0.12	19.6	0.068	27.6	18.2	0.094	34.3	0.07	16.1	60.6	16.5	3.12	9.56	0.56	2.81	8.38	39.6	4.39	31.6	14.9	38.4	34.3	2.24	5.23	0.8	4.4	0.99	8.72	1.06	28.1	2.39	53.6
106195	2	1	74.8	77.6	22.4	5.02	56.3	4	16.5	2.27	29.6	39.7	2.08	9.17	0.24	0.58	49	0.42	27.9	0.26	42.3	21.1	0.27	8.12	0.026	17.7	81.5	20.1	5.43	10.2	0.47	1.65	11.9	54	2.28	14.1	18.3	48.1	50.6	13.5	5.5	1.56	7.16	0.96	8.66	1.64	40.2	1.33	38.5
106198	2	2	69.4	67.4	32.6	7.12	52.6	4.67	17.7	3.51	36.7	34.9	2.84	3.63	0.15	0.69	42.9	0.46	26.6	0.25	36.9	16.3	0.3	19.5	0.051	17.4	76.5	31	7.44	6.35	1.5	2.05	18.3	44.4	3.69	16.3	20.1	45	45.4	10.1	15.5	2.74	6.54	3.5	7.3	4.26	31.9	4.99	38.8
106199	2	2	50.1	75.8	24.2	9.1	30.4	6.7	10.5	3.16	51.6	19.9	3.28	8.92	0.77	1.04	12.8	0.57	6.9	0.21	40.9	5.89	0.14	45.3	0.35	28.2	70.4	26.3	11.1	10.9	2.91	3.28	8.63	39.8	3.71	19.7	26.1	57	48.7	29.4	13.2	3.04	8.81	2.87	11.4	3.59	33.2	3.7	33.4
106200	2	1	74.1	69.4	30.6	9.53	52	5.96	23.9	4.78	29.7	28.1	3.93	8.71	0.28	0.68	54.9	0.56	42.5	0.36	28.2	12.3	0.23	16.2	0.061	13.6	69.6	26.4	4.85	6.08	0.75	1.92	15.6	43.1	5.15	22.5	15.9	44.1	35.9	6.85	10.6	2.84	4.41	1.56	7.05	2.59	26.1	3.56	51.9
106201	2	2	58.5	71.3	28.7	7.22	66.6	5.8	30.5	4.74	23.6	36.1	2.09	2.57	0.14	0.77	60.5	0.44	45.5	0.34	27.8	15	0.39	10.9	0.015	18.4	88	33.9	8.63	8.22	0.85	0.66	22.2	48.9	2.19	8.31	14.2	31.7	39.6	5.47	13.7	2.84	4.23	1.59	5.54	4.09	28.4	5.2	48.1
109001	1	2	78.8	41.9	58.1	6.52	68.5	4.62	40.6	3.61	14.6	27.9	2.6	10.3	0.15	0.2	53.8	0.13	32.4	0.07	21.4	21.4	0.12	24.6	0.00859	8.73	33.8	20.4	1.34	3.4	1.1	2.89	4.1	25	13.9	48.3	19.5	44.8	28.3	2.8	4.6	0.65	4.48	0.95	13.4	0.73	22.4	2.26	55.1
109048	2	1	53.7	58.1	41.9	4.94	80.9	3.49	49.1	2.66	10.9	31.8	1.97	3.23	0.084	0.92	66.4	0.14	32.2	0.3	18.9	34.2	0.39	13.8	0.13	29	47.6	16.9	7.16	15.8	1.09	4.87	4.92	19.7	3.77	42.6	55	48.7	29	5.95	7.25	1.49	13.9	2.97	36.6	0.74	12.8	2.04	29.4
109065	1	2	88.7	36.3	63.7	7.1	57.7	6.09	27.7	4.36	30.6	29.9	2.44	4.58	0.14	0.18	49.6	0.096	25	0.052	25.3	24.7	0.087	24.9	0.019	21.1	84.1	30.7	11.6	8.14	0.66	0.73	16.1	48.3	2.35	12.2	28.5	36.8	44	3.12	11.4	2.92	8.7	2.59	14.3	2.03	30.3	3.83	35.3
109072	1	2	79.4	20.6	79.4	8.81	53	6.62	24	5.27	33.9	29	3.01	4.26	0.18	0.17	62.9	0.091	30.6	0.053	18.5	32.3	0.085	18.5	0.017	19.3	59.3	26.8	5.54	7.06	3.26	3.44	9.89	36.8	8.12	25.8	26.3	38.5	21.2	4.71	7.13	1.09	3.66	2.57	19	1.09	15.3	2.38	54.9
109081	1	2	62.7	49.4	50.6	7.44	46	5.34	18.5	4.42	38.9	27.5	2.34	7.61	0.37	0.34	42.5	0.22	25.2	0.14	44.4	17.4	0.12	12.8	0.03	23	63.6	24.5	8.63	10	1.36	3.01	9.44	35.5	5.05	27	17.3	34.6	23.3	5.18	7.04	1.44	4.23	1.36	10.3	1.17	16.5	3.08	61.9
109084	2	2	60.1	58.7	41.3	4.6	60.8	3.38	25.1	2.1	30.4	35.7	2.01	4.2	0.097	0.35	33.6	0.14	21.1	0.12	34.1	12.5	0.088	31.9	0.067	12.4	52.6	28.6	5.05	4.01	1.27	2.1	12.9	30.7	9.41	34.6	11.8	46.7	29	10.6	10	0.88	2.56	1.76	6.59	2.42	23.2	4.98	57.7
109087	2	1	80.7	46	54	6.24	63.5	4.61	35.2	3.55	21.7	28.4	2	8.58	0.31	0.23	50.9	0.15	28	0.064	24.5	22.9	0.093	24.4	0.043	22	53.2	22.9	8	9.31	1.81	2.85	8.64	27.3	4.46	37.7	27.6	40.4	30.7	9.45	8.44	2.05	6.14	2.63	16.8	1.21	21.3	2.54	47.4
109089	2	2	69	43.4	56.6	8.61	67.7	6.91	24.8	4.33	20.7	42.9	3.7	2.94	0.16	0.25	60.3	0.064	24.8	0.037	29.6	35.4	0.17	9.89	0.0089	16.7	79.3	17.7	5.38	8.75	0.8	1.77	9.93	55.3	1.61	16.5	22.1	47.5	45.1	6.42	8.57	1.85	8.64	1.82	9.75	2.45	32.2	2.45	40.9
109090	2	1	74.8	36.6	63.4	3.74	70.7	2.88	45.9	2.19	15.7	24.8	1.42	9.87	0.088	0.14	32.3	0.062	15.1	0.025	29.8	17.2	0.075	37.7	0.022	15.4	44.6	13.1	4.28	7.16	0.78	3.16	4.1	29.1	3.91	47.5	34.5	43.7	21.5	0.53	9.77	2.1	6.22	2.83	23.4	1.03	12.1	3.82	48.5
109092	2	1	72.8	62.5	37.5	5.09	46.2	3.98	22.5	3.03	39.7	23.7	1.67	9.04	0.15	0.35	48	0.18	23	0.12	32.6	25.1	0.15	19	0.042	19.2	79	19.5	5.81	10.8	0.73	1.89	10.2	52.2	2.72	15.7	16.4	36.4	36.9	5.63	7.3	1.23	5.09	1.28	8.85	1.84	28.7	2.95	50
109093	2	2	82	85.6	14.4	6.1	40.8	3.64	11.5	2.73	43.8	29.4	2.4	9.25	0.3	0.92	63	0.5	41.8	0.53	27.3	21.2	0.3	8.74	0.05	12.4	88	11.4	2.72	8.08	0.35	1.27	6.83	70.3	1.46	8.97	15.6	47.6	60.3	11.7	5.6	1.64	7.34	0.71	5.87	2.01	49.3	1.24	31.9
109096	2	2	76.2	76.7	23.3	6.29	40.3	4.51	16.7	3.36	46.4	23.6	2.34	7.1	0.18	0.51	61.8	0.21	42.8	0.28	29.2	19	0.18	8.41	0.039	25.8	81.7	26.7	11.5	12.1	0.75	1.43	12.1	46	2.34	13.8	21.1	42.2	41.6	7.41	8.57	2.46	7.36	1.33	9.98	1.8	29.9	2.98	44.2
109098	2	1	55.7	58.1	41.9	5.8	59	4.29	24.8	2.65	30.5	34.2	2.3	4.67	0.23	0.37	33.4	0.18	21.1	0.089	33.8	12.3	0.1	32.4	0.071	16.3	55.3	30.8	6.35	5.42	1.8	2.7	13.2	30.3	9.41	30.8	16.1	52.7	38.1	14.6	10.9	1.5	5.31	1.65	7.63	2.77	28.5	5.01	47.6
109099	2	2	69.8	53.7	46.3	4.91	73.5	3.52	34.7	2.54	16	38.7	2.17	5.61	0.11	0.064	65.7	0.031	28.5	0.018	18.9	37.2	0.042	15.4	0.0026	14.3	61.3	16.5	4.04	7.29	0.75	2.26	7.51	42.5	4.24	31.4	18.5	49.6	28.1	1.7	7.34	1.26	4.17	1.65	11.5	1.19	21.5	3.23	55.6
109104	2	1	62.7	42.5	57.5	5.96	55.3	4.64	25.5	3.46	32.2	29.8	1.86	6.57	0.21	0.59	34.1	0.16	21.6	0.25	44.6	12.5	0.15	20.8	0.099	18.8	84.1	26.8	7.21	9.86	0.41	1.37	17.1	49.9	2.07	12	19.7	36.8	33.2	8	7.05	1.11	4.18	1.28	13.2	1.74	26.2	2.93	49.4
109113	2	1	64.7	74.7	25.3	3.36	52.5	2.84	20.8	1.63	38	31.7	1.38	6.08	0.091	0.36	48.6	0.15	25.3	0.11	42.1	23.4	0.12	8.86	0.044	16.4	86.1	22.8	5	9.64	0.72	1.04	14.7	56.8	2.43	9.66	12.9	47.5	49	10.3	10	1.1	4.08	1.3	6.39	3.31	40.5	4.32	39
[truncated: 300 more columns]

## Sheet: Th17 freq of CD4
			Frequency of CD4 T cells	Frequency of CD4 T cells	Frequency of CD4 T cells	Frequency of CD4 T cells	Frequency of CD4 T cells
			CD4+	CD4+	CD4+	CD4+	CD4+
Donor ID	HIV	CVD status	9 Tregs	40 CD25+ & Tregs+	62 EM/CCR6+CD26+CD161+	87 TCM/CCR6+CD26+CD161+	32 CD45RA neg Memory /CCR6+CD26+CD161+
102002	1	2	4.57	3.63	2.08	2.75	4.82
102005	1	1	5.52	3.44	0.99	1.68	2.67
102006	1	2	11	8.27	2.2	2.62	4.81
104004	1	1	19.7	13.2	0.88	1.1	1.98
104007	1	2	2.58	1.92	0.78	1.65	2.43
104011	1	1	12.9	10.5	0.69	0.72	1.41
104013	1	1	10.3	8.08	1.15	1.6	2.74
104021	1	1	9.46	7.71	1.6	6.96	8.56
104025	1	1	11.6	8.44	0.81	2.31	3.12
104026	1	1	9.18	7.61	0.55	0.93	1.48
104028	1	2	17.3	8.76	1.39	3.15	4.54
104029	1	2	9.96	7.9	1.9	3.18	5.08
104034	1	1	3.86	3.09	1.27	2.73	4
104035	1	2	8.97	6.69	2.72	2.6	5.32
104036	1	1	6.85	4.68	0.33	1.68	2.01
104038	1	1	8.24	4.12	0.88	1.03	1.91
104039	1	2	5.6	4.16	1.74	2.71	4.44
104040	1	2	7.41	5.47	1.78	1.44	3.22
104044	1	1	6.1	3.82	0.71	0.52	1.23
104045	1	1	10.9	8.39	1.82	4.35	6.17
104052	1	1	6.69	5.28	0.64	1.18	1.82
104056	1	2	7.53	6.45	1.93	1.61	3.54
104058	1	1	7.15	4.7	2.49	2.36	4.85
104065	1	1	14.2	9.42	1.44	1.45	2.89
104066	1	1	7.06	5.05	1.21	1.53	2.74
104068	1	1	10.5	7.57	3.24	2.67	5.91
104071	1	1	7.59	5.88	1.32	1.59	2.91
104073	1	1	8.59	6.12	2.57	2.76	5.33
104079	1	1	6.68	4.78	2.29	2.54	4.83
104084	1	2	5.46	4.07	2.13	2	4.14
106006	1	1	11.9	9.19	0.48	1.17	1.65
106008	1	2	6.61	4.73	2.06	3.14	5.2
106011	1	1	11.2	9.28	0.63	1.21	1.84
106015	1	2	10.9	8.86	1.81	2.25	4.07
106020	1	1	5.56	3.78	1.99	3.06	5.05
106034	1	1	7.86	5.68	0.97	1.47	2.44
106037	1	1	11.6	8.53	1.63	1.65	3.28
106038	1	1	4.81	3.82	1.87	3.56	5.43
106039	1	1	5.41	4.14	0.95	1.4	2.35
106040	1	1	14.8	11.3	1.5	1.5	3.01
106043	1	1	7.48	6.29	0.41	1.02	1.42
106046	1	1	11.4	9.74	0.82	2.4	3.21
106048	1	1	12.4	8.56	1.19	1.56	2.75
106057	1	2	5.79	4.42	0.39	1.18	1.57
106061	1	1	3.7	2.96	0.69	1.23	1.93
106065	1	1	8.65	6.26	0.4	0.69	1.09
106072	1	1	7.66	5.04	0.8	1.03	1.83
106080	1	1	5.55	3.77	0.26	1.59	1.85
106081	1	1	5.9	3.75	0.68	0.74	1.43
106082	1	1	7.97	5.38	2.46	2.62	5.08
106083	1	1	10.5	8.85	1.81	4.15	5.96
106088	1	2	9.54	7.79	4.55	5.81	10.4
106096	1	1	28	21.7	0.91	1.17	2.08
106099	1	2	5.79	4.78	1.1	4.28	5.37
106115	1	2	9.3	5.4	1.39	2.74	4.13
106117	1	2	15.9	11.9	1.05	1.21	2.26
106121	1	2	5.51	4.41	1.75	3	4.75
106158	2	1	6.79	4.09	1.14	2.29	3.43
106166	2	1	6.77	5.46	0.75	1.89	2.64
106177	2	1	2.69	2.4	0.35	1.23	1.58
106183	2	1	4.05	3.03	1.45	1.14	2.59
106195	2	1	5.02	4	1.47	1.59	3.06
106198	2	2	7.12	4.67	1.39	2.52	3.91
106199	2	2	9.1	6.7	1.37	2	3.37
106200	2	1	9.53	5.96	1.39	1.14	2.52
106201	2	2	7.22	5.8	3.3	2.45	5.75
109001	1	2	6.52	4.62	0.4	0.53	0.92
109048	2	1	4.94	3.49	2.55	3.24	5.79
109065	1	2	7.1	6.09	3.77	2.9	6.67
109072	1	2	8.81	6.62	1.53	1.41	2.94
109081	1	2	7.44	5.34	1.39	2.58	3.97
109084	2	2	4.6	3.38	1	2.07	3.07
109087	2	1	6.24	4.61	2.64	2.44	5.08
109089	2	2	8.61	6.91	1.34	2.31	3.64
109090	2	1	3.74	2.88	1.35	1.67	3.02
109092	2	1	5.09	3.98	1.65	1.03	2.68
109093	2	2	6.1	3.64	0.52	0.59	1.11
109096	2	2	6.29	4.51	2.37	2.24	4.62
109098	2	1	5.8	4.29	1.28	2.47	3.75
109099	2	2	4.91	3.52	1.45	1.52	2.97
109104	2	1	5.96	4.64	2.59	1.39	3.98
109113	2	1	3.36	2.84	1.04	1.58	2.62

## Sheet: Facs annotation
Code	Updated annotation	Updated parent gate	Original annotation
p1	T_cells	Live	T_cells
p2	CD4p	T_cells	CD4p
p3	CD4n	T_cells	CD4n
p4	Tregs	CD4p	Tregs
p5	Memory	CD4p	Memory
p6	CD25pTregs	CD4p	CD25pTregs
p7	EM	CD4p	EM
p8	EM_Tregs	CD4p	EM_Tregs
p9	Naive	CD4p	Naive
p10	TCM	CD4p	TCM
p11	TCM_Tregs	CD4p	TCM_Tregs
p12	EMRA	CD4p	EMRA
p13	EMRA_Tregs	CD4p	EMRA_Tregs
p14	Tregs	CD4n	Tregs
p15	Memory	CD4n	Memory
p16	CD25pTregs	CD4n	CD25pTregs
p17	EM	CD4n	EM
p18	EM_Tregs	CD4n	EM Tregs
p19	Naive	CD4n	Naive
p20	TCM	CD4n	TCM
p21	TCM_Tregs	CD4n	TCM Tregs
p22	EMRA	CD4n	EMRA
p23	EMRA_Tregs	CD4n	EMRA Tregs
p24	Memory _CCR6	CD4p_Memory	Memory /CCR6
p25	Memory _CD26	CD4p_Memory	Memory /CD26
p26	Memory _CD161	CD4p_Memory	Memory /CD161
p27	Memory _CCR6pCD26pCD161p	CD4p_Memory	Memory _CCR6pCD26+CD161+
p28	Memory _CCR6pCD26pCD161n	CD4p_Memory	Memory /CCR6+CD26+CD161-
p29	Memory _CCR6pCD26nCD161p	CD4p_Memory	Memory /CCR6+CD26-CD161+
p30	Memory _CCR6pCD26nCD161n	CD4p_Memory	292 Memory /CCR6+CD26-CD161-
p31	Memory _CCR6nCD26pCD161p	CD4p_Memory	293 Memory /CCR6-CD26+CD161+
p32	Memory _CCR6nCD26pCD161n	CD4p_Memory	294 Memory /CCR6-CD26+CD161-
p33	Memory _CCR6nCD26nCD161p	CD4p_Memory	295 Memory /CCR6-CD26-CD161+
p34	Memory _CCR6nCD26nCD161n	CD4p_Memory	296 Memory /CCR6-CD26-CD161-
p35	CD25pTregs_CCR6	CD4p_CD25pTregs	297CD25+ Tregs/CCR6
p36	CD25pTregs_CCR7	CD4p_CD25pTregs	298CD25+ Tregs/CCR7
p37	CD25pTregs_CD26	CD4p_CD25pTregs	299CD25+ Tregs/CD26
p38	CD25pTregs_CD45RA	CD4p_CD25pTregs	300CD25+ Tregs/CD45RA
p39	CD25pTregs_CD161	CD4p_CD25pTregs	301CD25+ Tregs/CD161
p40	CD25pTregs_CCR6pCD26pCD161p	CD4p_CD25pTregs	CD25pTregs_CCR6+CD26+CD161+
p41	CD25pTregs_CCR6pCD26pCD161n	CD4p_CD25pTregs	303CD25+ Tregs/CCR6+CD26+CD161-
p42	CD25pTregs_CCR6pCD26nCD161p	CD4p_CD25pTregs	304CD25+ Tregs/CCR6+CD26-CD161+
p43	CD25pTregs_CCR6pCD26nCD161n	CD4p_CD25pTregs	305CD25+ Tregs/CCR6+CD26-CD161-
p44	CD25pTregs_CCR6nCD26pCD161p	CD4p_CD25pTregs	306CD25+ Tregs/CCR6-CD26+CD161+
p45	CD25pTregs_CCR6nCD26pCD161n	CD4p_CD25pTregs	307CD25+ Tregs/CCR6-CD26+CD161-
p46	CD25pTregs_CCR6nCD26nCD161p	CD4p_CD25pTregs	308CD25+ Tregs/CCR6-CD26-CD161+
p47	CD25pTregs_CCR6nCD26nCD161n	CD4p_CD25pTregs	309CD25+ Tregs/CCR6-CD26-CD161-
p48	CD25pTregs_CCR7pCD45RAp	CD4p_CD25pTregs	310CD25+ Tregs/CCR7+CD45RA+
p49	CD25pTregs_CCR7pCD45RAn	CD4p_CD25pTregs	311CD25+ Tregs/CCR7+CD45RA-
p50	CD25pTregs_CCR7nCD45RAp	CD4p_CD25pTregs	312CD25+ Tregs/CCR7-CD45RA+
p51	CD25pTregs_CCR7nCD45RAn	CD4p_CD25pTregs	313CD25+ Tregs/CCR7-CD45RA-
p52	EM_CCR6	CD4p_EM	314 EM/CCR6
p53	EM_CD26	CD4p_EM	315 EM/CD26
p54	EM_CD161	CD4p_EM	316 EM/CD161
p55	EM_CCR6pCD26pCD161p	CD4p_EM	317 EM/CCR6+CD26+CD161+
p56	EM_CCR6pCD26pCD161n	CD4p_EM	318 EM/CCR6+CD26+CD161-
p57	EM_CCR6pCD26nCD161p	CD4p_EM	319 EM/CCR6+CD26-CD161+
p58	EM_CCR6pCD26nCD161n	CD4p_EM	320 EM/CCR6+CD26-CD161-
p59	EM_CCR6nCD26pCD161p	CD4p_EM	321 EM/CCR6-CD26+CD161+
p60	EM_CCR6nCD26pCD161n	CD4p_EM	322 EM/CCR6-CD26+CD161-
p61	EM_CCR6nCD26nCD161p	CD4p_EM	323 EM/CCR6-CD26-CD161+
p62	EM_CCR6nCD26nCD161n	CD4p_EM	324 EM/CCR6-CD26-CD161-
p63	EM_Tregs_CCR6	CD4p_EM_Tregs	325 EM Tregs/CCR6
p64	EM_Tregs_CD26	CD4p_EM_Tregs	326 EM Tregs/CD26
p65	EM_Tregs_CD161	CD4p_EM_Tregs	327 EM Tregs/CD161
p66	EM_Tregs_CCR6pCD26pCD161p	CD4p_EM_Tregs	328 EM Tregs/CCR6+CD26+CD161+
p67	EM_Tregs_CCR6pCD26pCD161n	CD4p_EM_Tregs	329 EM Tregs/CCR6+CD26+CD161-
p68	EM_Tregs_CCR6pCD26nCD161p	CD4p_EM_Tregs	330 EM Tregs/CCR6+CD26-CD161+
p69	EM_Tregs_CCR6pCD26nCD161n	CD4p_EM_Tregs	331 EM Tregs/CCR6+CD26-CD161-
p70	EM_Tregs_CCR6nCD26pCD161p	CD4p_EM_Tregs	332 EM Tregs/CCR6-CD26+CD161+
p71	EM_Tregs_CCR6nCD26pCD161n	CD4p_EM_Tregs	333 EM Tregs/CCR6-CD26+CD161-
p72	EM_Tregs_CCR6nCD26nCD161p	CD4p_EM_Tregs	334 EM Tregs/CCR6-CD26-CD161+
p73	EM_Tregs_CCR6nCD26nCD161n	CD4p_EM_Tregs	335 EM Tregs/CCR6-CD26-CD161-
p74	TCM_CCR6	CD4p_TCM	336 TCM/CCR6
p75	TCM_CD26	CD4p_TCM	337 TCM/CD26
p76	TCM_CD161	CD4p_TCM	338 TCM/CD161
p77	TCM_CCR6pCD26pCD161p	CD4p_TCM	339 TCM/CCR6+CD26+CD161+
p78	TCM_CCR6pCD26pCD161n	CD4p_TCM	340 TCM/CCR6+CD26+CD161-
p79	TCM_CCR6pCD26nCD161p	CD4p_TCM	341 TCM/CCR6+CD26-CD161+
p80	TCM_CCR6pCD26nCD161n	CD4p_TCM	342 TCM/CCR6+CD26-CD161-
p81	TCM_CCR6nCD26pCD161p	CD4p_TCM	343 TCM/CCR6-CD26+CD161+
p82	TCM_CCR6nCD26pCD161n	CD4p_TCM	344 TCM/CCR6-CD26+CD161-
p83	TCM_CCR6nCD26nCD161p	CD4p_TCM	345 TCM/CCR6-CD26-CD161+
p84	TCM_CCR6nCD26nCD161n	CD4p_TCM	346 TCM/CCR6-CD26-CD161-
p85	TCM_Tregs_CCR6	CD4p_TCM_Tregs	347 TCM Tregs/CCR6
p86	TCM_Tregs_CD26	CD4p_TCM_Tregs	348 TCM Tregs/CD26
p87	TCM_Tregs_CD161	CD4p_TCM_Tregs	349 TCM Tregs/CD161
p88	TCM_Tregs_CCR6PCD26PCD161P	CD4p_TCM_Tregs	350 TCM Tregs/CCR6+CD26+CD161+
p89	TCM_Tregs_CCR6PCD26PCD161n	CD4p_TCM_Tregs	351 TCM Tregs/CCR6+CD26+CD161-
p90	TCM_Tregs_CCR6PCD26nCD161P	CD4p_TCM_Tregs	352 TCM Tregs/CCR6+CD26-CD161+
p91	TCM_Tregs_CCR6PCD26nCD161n	CD4p_TCM_Tregs	353 TCM Tregs/CCR6+CD26-CD161-
p92	TCM_Tregs_CCR6nCD26PCD161P	CD4p_TCM_Tregs	354 TCM Tregs/CCR6-CD26+CD161+
p93	TCM_Tregs_CCR6nCD26PCD161n	CD4p_TCM_Tregs	355 TCM Tregs/CCR6-CD26+CD161-
p94	TCM_Tregs_CCR6nCD26nCD161P	CD4p_TCM_Tregs	356 TCM Tregs/CCR6-CD26-CD161+
p95	TCM_Tregs_CCR6nCD26nCD161n	CD4p_TCM_Tregs	357 TCM Tregs/CCR6-CD26-CD161-
p96	EMRA_CCR6	CD4p_EMRA	358 EMRA/CCR6
p97	EMRA_CD26	CD4p_EMRA	359 EMRA/CD26
p98	EMRA_CD161	CD4p_EMRA	360 EMRA/CD161
p99	EMRA_CCR6pCD26pCD161p	CD4p_EMRA	361 EMRA/CCR6+CD26+CD161+
p100	EMRA_CCR6pCD26pCD161n	CD4p_EMRA	362 EMRA/CCR6+CD26+CD161-
p101	EMRA_CCR6pCD26nCD161p	CD4p_EMRA	363 EMRA/CCR6+CD26-CD161+
p102	EMRA_CCR6pCD26nCD161n	CD4p_EMRA	364 EMRA/CCR6+CD26-CD161-
p103	EMRA_CCR6nCD26pCD161p	CD4p_EMRA	365 EMRA/CCR6-CD26+CD161+
p104	EMRA_CCR6nCD26pCD161n	CD4p_EMRA	366 EMRA/CCR6-CD26+CD161-
p105	EMRA_CCR6nCD26nCD161p	CD4p_EMRA	367 EMRA/CCR6-CD26-CD161+
p106	EMRA_CCR6nCD26nCD161n	CD4p_EMRA	368 EMRA/CCR6-CD26-CD161-
p107	EMRA_Tregs_CCR6	CD4p_EMRA_Tregs	369 EMRA Tregs/CCR6
p108	EMRA_Tregs_CD26	CD4p_EMRA_Tregs	370 EMRA Tregs/CD26
p109	EMRA_Tregs_CD161	CD4p_EMRA_Tregs	371 EMRA Tregs/CD161
p110	EMRA_Tregs_CCR6pCD26pCD161p	CD4p_EMRA_Tregs	372 EMRA Tregs/CCR6+CD26+CD161+
p111	EMRA_Tregs_CCR6pCD26pCD161n	CD4p_EMRA_Tregs	373 EMRA Tregs/CCR6+CD26+CD161-
p112	EMRA_Tregs_CCR6pCD26nCD161p	CD4p_EMRA_Tregs	374 EMRA Tregs/CCR6+CD26-CD161+
p113	EMRA_Tregs_CCR6pCD26nCD161n	CD4p_EMRA_Tregs	375 EMRA Tregs/CCR6+CD26-CD161-
p114	EMRA_Tregs_CCR6nCD26pCD161p	CD4p_EMRA_Tregs	376 EMRA Tregs/CCR6-CD26+CD161+
p115	EMRA_Tregs_CCR6nCD26pCD161n	CD4p_EMRA_Tregs	377 EMRA Tregs/CCR6-CD26+CD161-
p116	EMRA_Tregs_CCR6nCD26nCD161p	CD4p_EMRA_Tregs	378 EMRA Tregs/CCR6-CD26-CD161+
p117	EMRA_Tregs_CCR6nCD26nCD161n	CD4p_EMRA_Tregs	379 EMRA Tregs/CCR6-CD26-CD161-
p118	MemoryTh7_Tregs _ratio	CD4p	131 Memory Th7 /Tregs ratio
p119	EMTh17_Tregs_ ratio	CD4p	132 EM Th17/ Tregs ratio
p120	TCMTh17_Tregs ratio	CD4p	133 TCM Th17/Tregs ratio
p121	MemoryTh17_CD25pTregs_ratio	CD4p	134 Memory Th17/CD25+ Tregs
p122	EMTh17_ CD25pTregs_ratio	CD4p	135 EM Th17/ CD25+ Tregs
p123	TCMTh17_CD25pTregs_ratio	CD4p	136 TCM Th17/CD25+ Tregs
p124	Memory_CCR6	CD4n_Memory	398 Memory /CCR6
p125	Memory_CD26	CD4n_Memory	399 Memory /CD26
p126	Memory_CD161	CD4n_Memory	400 Memory /CD161
p127	Memory_CCR6pCD26pCD161p	CD4n_Memory	401 Memory /CCR6+CD26+CD161+
p128	Memory_CCR6pCD26pCD161n	CD4n_Memory	402 Memory /CCR6+CD26+CD161-
p129	Memory_CCR6pCD26nCD161p	CD4n_Memory	403 Memory /CCR6+CD26-CD161+
p130	Memory_CCR6pCD26nCD161n	CD4n_Memory	404 Memory /CCR6+CD26-CD161-
p131	Memory_CCR6nCD26pCD161p	CD4n_Memory	405 Memory /CCR6-CD26+CD161+
p132	Memory_CCR6nCD26pCD161n	CD4n_Memory	406 Memory /CCR6-CD26+CD161-
p133	Memory_CCR6nCD26nCD161p	CD4n_Memory	407 Memory /CCR6-CD26-CD161+
p134	Memory_CCR6nCD26nCD161n	CD4n_Memory	408 Memory /CCR6-CD26-CD161-
p135	CD25pTregs_CCR6	CD4n_CD25pTregs	409 CD25+ Tregs/CCR6
p136	CD25pTregs_CCR7	CD4n_CD25pTregs	410 CD25+ Tregs/CCR7
p137	CD25pTregs_CD26	CD4n_CD25pTregs	411 CD25+ Tregs/CD26
p138	CD25pTregs_CD45RA	CD4n_CD25pTregs	412 CD25+ Tregs/CD45RA
p139	CD25pTregs_CD161	CD4n_CD25pTregs	413 CD25+ Tregs/CD161
p140	CD25pTregs_CCR6pCD26pCD161p	CD4n_CD25pTregs	414 CD25+ Tregs/CCR6+CD26+CD161+
p141	CD25pTregs_CCR6pCD26pCD161n	CD4n_CD25pTregs	415 CD25+ Tregs/CCR6+CD26+CD161-
p142	CD25pTregs_CCR6pCD26nCD161p	CD4n_CD25pTregs	416 CD25+ Tregs/CCR6+CD26-CD161+
p143	CD25pTregs_CCR6pCD26nCD161n	CD4n_CD25pTregs	417 CD25+ Tregs/CCR6+CD26-CD161-
p144	CD25pTregs_CCR6nCD26pCD161p	CD4n_CD25pTregs	418 CD25+ Tregs/CCR6-CD26+CD161+
p145	CD25pTregs_CCR6nCD26pCD161n	CD4n_CD25pTregs	419 CD25+ Tregs/CCR6-CD26+CD161-
p146	CD25pTregs_CCR6nCD26nCD161p	CD4n_CD25pTregs	420 CD25+ Tregs/CCR6-CD26-CD161+
p147	CD25pTregs_CCR6nCD26nCD161n	CD4n_CD25pTregs	421 CD25+ Tregs/CCR6-CD26-CD161-
p148	CD25pTregs_CCR7pCD45RAp	CD4n_CD25pTregs	422 CD25+ Tregs/CCR7+CD45RA+
p149	CD25pTregs_CCR7pCD45RAn	CD4n_CD25pTregs	423 CD25+ Tregs/CCR7+CD45RA-
p150	CD25pTregs_CCR7nCD45RAp	CD4n_CD25pTregs	424 CD25+ Tregs/CCR7-CD45RA+
p151	CD25pTregs_CCR7nCD45RAn	CD4n_CD25pTregs	425 CD25+ Tregs/CCR7-CD45RA-
p152	EM_CCR6	CD4n_EM	426 EM/CCR6
p153	EM_CD26	CD4n_EM	427 EM/CD26
p154	EM_CD161	CD4n_EM	428 EM/CD161
p155	EM_CCR6pCD26pCD161p	CD4n_EM	429 EM/CCR6+CD26+CD161+
p156	EM_CCR6pCD26pCD161n	CD4n_EM	430 EM/CCR6+CD26+CD161-
p157	EM_CCR6pCD26nCD161p	CD4n_EM	431 EM/CCR6+CD26-CD161+
p158	EM_CCR6pCD26nCD161n	CD4n_EM	432 EM/CCR6+CD26-CD161-
p159	EM_CCR6nCD26pCD161p	CD4n_EM	433 EM/CCR6-CD26+CD161+
p160	EM_CCR6nCD26pCD161n	CD4n_EM	434 EM/CCR6-CD26+CD161-
p161	EM_CCR6nCD26nCD161p	CD4n_EM	435 EM/CCR6-CD26-CD161+
p162	EM_CCR6nCD26nCD161n	CD4n_EM	436 EM/CCR6-CD26-CD161-
p163	EM_Tregs_CCR6	CD4n_EM_Tregs	437 EM Tregs/CCR6
p164	EM_Tregs_CD26	CD4n_EM_Tregs	438 EM Tregs/CD26
p165	EM_Tregs_CD161	CD4n_EM_Tregs	439 EM Tregs/CD161
p166	EM_Tregs_CCR6pCD26pCD161p	CD4n_EM_Tregs	440 EM Tregs/CCR6+CD26+CD161+
p167	EM_Tregs_CCR6pCD26pCD161n	CD4n_EM_Tregs	441 EM Tregs/CCR6+CD26+CD161-
p168	EM_Tregs_CCR6pCD26nCD161p	CD4n_EM_Tregs	442 EM Tregs/CCR6+CD26-CD161+
p169	EM_Tregs_CCR6pCD26nCD161n	CD4n_EM_Tregs	443 EM Tregs/CCR6+CD26-CD161-
p170	EM_Tregs_CCR6nCD26pCD161p	CD4n_EM_Tregs	444 EM Tregs/CCR6-CD26+CD161+
p171	EM_Tregs_CCR6nCD26pCD161n	CD4n_EM_Tregs	445 EM Tregs/CCR6-CD26+CD161-
p172	EM_Tregs_CCR6nCD26nCD161p	CD4n_EM_Tregs	446 EM Tregs/CCR6-CD26-CD161+
p173	EM_Tregs_CCR6nCD26nCD161n	CD4n_EM_Tregs	447 EM Tregs/CCR6-CD26-CD161-
p174	TCM_CCR6	CD4n_TCM	449 TCM/CCR6
p175	TCM_CD26	CD4n_TCM	450 TCM/CD26
p176	TCM_CD161	CD4n_TCM	451 TCM/CD161
p177	TCM_CCR6pCD26pCD161p	CD4n_TCM	452 TCM/CCR6+CD26+CD161+
p178	TCM_CCR6pCD26pCD161n	CD4n_TCM	453 TCM/CCR6+CD26+CD161-
p179	TCM_CCR6pCD26nCD161p	CD4n_TCM	454 TCM/CCR6+CD26-CD161+
p180	TCM_CCR6pCD26nCD161n	CD4n_TCM	455 TCM/CCR6+CD26-CD161-
p181	TCM_CCR6nCD26pCD161p	CD4n_TCM	456 TCM/CCR6-CD26+CD161+
p182	TCM_CCR6nCD26pCD161n	CD4n_TCM	457 TCM/CCR6-CD26+CD161-
p183	TCM_CCR6nCD26nCD161p	CD4n_TCM	458 TCM/CCR6-CD26-CD161+
p184	TCM_CCR6nCD26nCD161n	CD4n_TCM	459 TCM/CCR6-CD26-CD161-
p185	TCM_Tregs_CCR6	CD4n_TCM_Tregs	460 TCM Tregs/CCR6
p186	TCM_Tregs_CD26	CD4n_TCM_Tregs	461 TCM Tregs/CD26
p187	TCM_Tregs_CD161	CD4n_TCM_Tregs	462 TCM Tregs/CD161
p188	TCM_Tregs_CCR6pCD26pCD161p	CD4n_TCM_Tregs	463 TCM Tregs/CCR6+CD26+CD161+
p189	TCM_Tregs_CCR6pCD26pCD161n	CD4n_TCM_Tregs	464 TCM Tregs/CCR6+CD26+CD161-
p190	TCM_Tregs_CCR6pCD26nCD161p	CD4n_TCM_Tregs	465 TCM Tregs/CCR6+CD26-CD161+
p191	TCM_Tregs_CCR6pCD26nCD161n	CD4n_TCM_Tregs	466 TCM Tregs/CCR6+CD26-CD161-
p192	TCM_Tregs_CCR6nCD26pCD161p	CD4n_TCM_Tregs	467 TCM Tregs/CCR6-CD26+CD161+
p193	TCM_Tregs_CCR6nCD26pCD161n	CD4n_TCM_Tregs	468 TCM Tregs/CCR6-CD26+CD161-
p194	TCM_Tregs_CCR6nCD26nCD161p	CD4n_TCM_Tregs	469 TCM Tregs/CCR6-CD26-CD161+
p195	TCM_Tregs_CCR6nCD26nCD161n	CD4n_TCM_Tregs	470 TCM Tregs/CCR6-CD26-CD161-
p196	EMRA_CCR6	CD4n_EMRA	471 EMRA/CCR6
p197	EMRA_CD26	CD4n_EMRA	472 EMRA/CD26
p198	EMRA_CD161	CD4n_EMRA	473 EMRA/CD161
p199	EMRA_CCR6pCD26pCD161p	CD4n_EMRA	474 EMRA/CCR6+CD26+CD161+
p200	EMRA_CCR6pCD26pCD161n	CD4n_EMRA	475 EMRA/CCR6+CD26+CD161-
p201	EMRA_CCR6pCD26nCD161p	CD4n_EMRA	476 EMRA/CCR6+CD26-CD161+
p202	EMRA_CCR6pCD26nCD161n	CD4n_EMRA	477 EMRA/CCR6+CD26-CD161-
p203	EMRA_CCR6nCD26pCD161p	CD4n_EMRA	478 EMRA/CCR6-CD26+CD161+
p204	EMRA_CCR6nCD26pCD161n	CD4n_EMRA	479 EMRA/CCR6-CD26+CD161-
p205	EMRA_CCR6nCD26nCD161p	CD4n_EMRA	480 EMRA/CCR6-CD26-CD161+
p206	EMRA_CCR6nCD26nCD161n	CD4n_EMRA	481 EMRA/CCR6-CD26-CD161-
p207	EMRA_Tregs_CCR6	CD4n_EMRA_Tregs	482 EMRA Tregs/CCR6
p208	EMRA_Tregs_CD26	CD4n_EMRA_Tregs	483 EMRA Tregs/CD26
p209	EMRA_Tregs_CD161	CD4n_EMRA_Tregs	484 EMRA Tregs/CD161
p210	EMRA_Tregs_CCR6pCD26pCD161p	CD4n_EMRA_Tregs	485 EMRA Tregs/CCR6+CD26+CD161+
p211	EMRA_Tregs_CCR6pCD26pCD161n	CD4n_EMRA_Tregs	486 EMRA Tregs/CCR6+CD26+CD161-
p212	EMRA_Tregs_CCR6pCD26nCD161p	CD4n_EMRA_Tregs	487 EMRA Tregs/CCR6+CD26-CD161+
p213	EMRA_Tregs_CCR6pCD26nCD161n	CD4n_EMRA_Tregs	488 EMRA Tregs/CCR6+CD26-CD161-
p214	EMRA_Tregs_CCR6nCD26pCD161p	CD4n_EMRA_Tregs	489 EMRA Tregs/CCR6-CD26+CD161+
p215	EMRA_Tregs_CCR6nCD26pCD161n	CD4n_EMRA_Tregs	490 EMRA Tregs/CCR6-CD26+CD161-
p216	EMRA_Tregs_CCR6nCD26nCD161p	CD4n_EMRA_Tregs	491 EMRA Tregs/CCR6-CD26-CD161+
p217	EMRA_Tregs_CCR6nCD26nCD161n	CD4n_EMRA_Tregs	492 EMRA Tregs/CCR6-CD26-CD161-
p218	DCs	Live	DCs
p219	pDCs	Live	pDCs
p220	CCR6	DCs	572 CCR6
p221	CCR9	DCs	573 CCR9
p222	CCR6pCCR9p	DCs	574 CCR6+CCR9+
p223	CCR6pCCR9n	DCs	575 CCR6+CCR9-
p224	CCR6nCCR9p	DCs	576 CCR6-CCR9+
p225	CCR6nCCR9n	DCs	577 CCR6-CCR9-
p226	CCR6	pDCs	578 CCR6
p227	CCR9	pDCs	579 CCR9
p228	CCR6pCCR9p	pDCs	580 CCR6+CCR9+
p229	CCR6pCCR9n	pDCs	581 CCR6+CCR9-
p230	CCR6nCCR9p	pDCs	582 CCR6-CCR9+
p231	CCR6nCCR9n	pDCs	583 CCR6-CCR9-
p232	Classical	Total_monocytes	584 Classical
p233	Intermediate	Total_monocytes	585 Intermediate
p234	MDC8	Total_monocytes	586 MDC8
p235	non-Classical	Total_monocytes	587 non-Classical
p236	Classical _CCR2	Total_monocytes_Classical	588 Classical /CCR2
p237	Classical _CX3CR1	Total_monocytes_Classical	589 Classical /CX3CR1
p238	Classical _HLADRhigh	Total_monocytes_Classical	590 Classical /HLADRhigh
p239	Classical _MDC8	Total_monocytes_Classical	591 Classical /MDC8
p240	Classical _CCR9	Total_monocytes_Classical	634 Classical /CCR9
	Classical _CCR2pCX3CR1pHLADRhigh	Total_monocytes_Classical	Classical /CCR2+CX3CR1+HLADRhigh+
p241	Classical _CCR2pCX3CR1pHLADRlow	Total_monocytes_Classical	592 Classical /CCR2+CX3CR1+HLADRhigh-
p242	Classical _CCR2pCX3CR1nHLADRhigh	Total_monocytes_Classical	593 Classical /CCR2+CX3CR1-HLADRhigh+
p243	Classical _CCR2pCX3CR1nHLADRlow	Total_monocytes_Classical	594 Classical /CCR2+CX3CR1-HLADRhigh-
p244	Classical _CCR2nCX3CR1pHLADRhigh	Total_monocytes_Classical	595 Classical /CCR2-CX3CR1+HLADRhigh+
p245	Classical _CCR2nCX3CR1pHLADRlow	Total_monocytes_Classical	596 Classical /CCR2-CX3CR1+HLADRhigh-
p246	Classical _CCR2nCX3CR1nHLADRhigh	Total_monocytes_Classical	597 Classical /CCR2-CX3CR1-HLADRhigh+
p247	Classical _CCR2nCX3CR1nHLADRlow	Total_monocytes_Classical	598 Classical /CCR2-CX3CR1-HLADRhigh-
p248	Intermediate_CCR2	Total_monocytes_Intermediate	599 Intermediate/CCR2
p249	Intermediate_CX3CR1	Total_monocytes_Intermediate	600 Intermediate/CX3CR1
p250	Intermediate_HLADRhigh	Total_monocytes_Intermediate	601 Intermediate/HLADRhigh
p251	Intermediate_MDC8	Total_monocytes_Intermediate	602 Intermediate/MDC8
p252	Intermediate _CCR9	Total_monocytes_Intermediate	640 Intermediate /CCR9
p253	Intermediate_CCR2pCX3CR1pHLADRhigh	Total_monocytes_Intermediate	603 Intermediate/CCR2+CX3CR1+HLADRhigh+
p254	Intermediate_CCR2pCX3CR1pHLADRlow	Total_monocytes_Intermediate	604 Intermediate/CCR2+CX3CR1+HLADRhigh-
p255	Intermediate_CCR2pCX3CR1nHLADRhigh	Total_monocytes_Intermediate	605 Intermediate/CCR2+CX3CR1-HLADRhigh+
p256	Intermediate_CCR2pCX3CR1nHLADRlow	Total_monocytes_Intermediate	606 Intermediate/CCR2+CX3CR1-HLADRhigh-
p257	Intermediate_CCR2nCX3CR1pHLADRhigh	Total_monocytes_Intermediate	607 Intermediate/CCR2-CX3CR1+HLADRhigh+
p258	Intermediate_CCR2nCX3CR1pHLADRlow	Total_monocytes_Intermediate	608 Intermediate/CCR2-CX3CR1+HLADRhigh-
p259	Intermediate_CCR2nCX3CR1nHLADRhigh	Total_monocytes_Intermediate	609 Intermediate/CCR2-CX3CR1-HLADRhigh+
p260	Intermediate_CCR2nCX3CR1nHLADRlow	Total_monocytes_Intermediate	610 Intermediate/CCR2-CX3CR1-HLADRhigh-
p261	MDC8_CCR2	Total_monocytes_MDC8	611 MDC8/CCR2
p262	MDC8_CX3CR1	Total_monocytes_MDC8	612 MDC8/CX3CR1
p263	MDC8_HLADRhigh	Total_monocytes_MDC8	613 MDC8/HLADRhigh
p264	MDC8_CCR2pCX3CR1pHLADRhigh	Total_monocytes_MDC8	614 MDC8/CCR2+CX3CR1+HLADRhigh+
p265	MDC8_CCR2pCX3CR1pHLADRlow	Total_monocytes_MDC8	615 MDC8/CCR2+CX3CR1+HLADRhigh-
p266	MDC8_CCR2pCX3CR1nHLADRhigh	Total_monocytes_MDC8	616 MDC8/CCR2+CX3CR1-HLADRhigh+
p267	MDC8_CCR2pCX3CR1nHLADRlow	Total_monocytes_MDC8	617 MDC8/CCR2+CX3CR1-HLADRhigh-
p268	MDC8_CCR2nCX3CR1pHLADRhigh	Total_monocytes_MDC8	618 MDC8/CCR2-CX3CR1+HLADRhigh+
p269	MDC8_CCR2nCX3CR1pHLADRlow	Total_monocytes_MDC8	619 MDC8/CCR2-CX3CR1+HLADRhigh-
p270	MDC8_CCR2nCX3CR1nHLADRhigh	Total_monocytes_MDC8	620 MDC8/CCR2-CX3CR1-HLADRhigh+
p271	MDC8_CCR2nCX3CR1nHLADRlow	Total_monocytes_MDC8	621 MDC8/CCR2-CX3CR1-HLADRhigh-
p272	nonClassical_CCR2	Total_monocytes_nonClassical	622 non-Classical/CCR2
p273	nonClassical_CX3CR1	Total_monocytes_nonClassical	623 non-Classical/CX3CR1
p274	nonClassical_HLADRhigh	Total_monocytes_nonClassical	624 non-Classical/HLADRhigh
p275	nonClassical_MDC8	Total_monocytes_nonClassical	625 non-Classical/MDC8
p276	nonClassical _CCR9	Total_monocytes_nonClassical	646 non- Classical /CCR9
p277	nonclassical_CCR2pCX3CR1pHLADRhigh	Total_monocytes_nonClassical	626 non-Classical/CCR2+CX3CR1+HLADRhigh+
p278	nonclassical_CCR2pCX3CR1pHLADRlow	Total_monocytes_nonClassical	627 non-Classical/CCR2+CX3CR1+HLADRhigh-
p279	nonclassical_CCR2pCX3CR1nHLADRhigh	Total_monocytes_nonClassical	628 non-Classical/CCR2+CX3CR1-HLADRhigh+
p280	nonclassical_CCR2pCX3CR1nHLADRlow	Total_monocytes_nonClassical	629 non-Classical/CCR2+CX3CR1-HLADRhigh-
p281	nonclassical_CCR2nCX3CR1pHLADRhigh	Total_monocytes_nonClassical	630 non-Classical/CCR2-CX3CR1+HLADRhigh+
p282	nonclassical_CCR2nCX3CR1pHLADRlow	Total_monocytes_nonClassical	631 non-Classical/CCR2-CX3CR1+HLADRhigh-
p283	nonclassical_CCR2nCX3CR1nHLADRhigh	Total_monocytes_nonClassical	632 non-Classical/CCR2-CX3CR1-HLADRhigh+
p284	nonclassical_CCR2nCX3CR1nHLADRlow	Total_monocytes_nonClassical	633 non-Classical/CCR2-CX3CR1-HLADRhigh-
p285	Classical _CCR9pHLADRhigh	Total_monocytes_Classical	636 Classical /CCR9+HLADR+
p286	Classical _CCR9pHLADRlow	Total_monocytes_Classical	637 Classical /CCR9+HLADR-
p287	Classical _CCR9nHLADRhigh	Total_monocytes_Classical	638 Classical /CCR9-HLADR+
p288	Classical _CCR9nHLADRlow	Total_monocytes_Classical	639 Classical /CCR9-HLADR-
p289	Intermediate _CCR9pHLADRhigh	Total_monocytes_Intermediate	642 Intermediate /CCR9+HLADR+
p290	Intermediate _CCR9pHLADRlow	Total_monocytes_Intermediate	643 Intermediate /CCR9+HLADR-
p291	Intermediate _CCR9nHLADRhigh	Total_monocytes_Intermediate	644 Intermediate /CCR9-HLADR+
p292	Intermediate _CCR9nHLADRlow	Total_monocytes_Intermediate	645 Intermediate /CCR9-HLADR-
p293	nonclassical _CCR9pHLADRhigh	Total_monocytes_nonClassical	648 non- Classical /CCR9+HLADR+
p294	nonclassical _CCR9pHLADRlow	Total_monocytes_nonClassical	649 non- Classical /CCR9+HLADR-
p295	nonclassical _CCR9nHLADRhigh	Total_monocytes_nonClassical	650 non- Classical /CCR9-HLADR+
p296	nonclassical_CCR9nHLADRlow	Total_monocytes_nonClassical	651 non- Classical /CCR9-HLADR-

## Sheet: Units & Categories
	Variable name	Units (if numerical)	Categories (if categorical)
	pid		paticipant ID
	age		years		age
	sex		biological sex
	waist	cm
	height	cm
	weight	kg
	bmi	kg/m2			bmi
	fram		Framingham Risk score		fram
	statins		VRAI = on statins at time of CT scan date		statins
	dm_code (Diabetes)		[1] Yes [2] No
	smoking_code		[1] Never Smoked [2] Current Smoker [3] Ex smoker		smoking_code
	packyears	Years			packyears
	alcohol_code		[1] Does not drink [2] Ex Drinker [3] Social Drinker [4] Excessive Drinker
	ivdu(intravenous drug use)		[1] Yes [2] No
	exercise_code		[1] Yes, at least 30 minutes every day [2] Yes, at least 30 minutes 3 times a week [3] Yes, at least 30 minutes 1 time a week [4] No regular physical activity
	hb	G/L
	wbc	xE9/L
	lymphocytes	xE9/L
	hsCRP	mg/L
	fibrinogen	G/L			fibrinogen
	d dimer	ug/L			d dimer
	Total Cholesterol	mmol/L
	HDL	mmol/L			HDL
	LDL	mmol/L			LDL
	Ratio calc	[total cholesterol / HDL]
	Triglyceride	mmol/L			Triglyceride
	insulin	pmol/L			insulin
	vl(viral lode)	copies/mL
	arv_duration	years			arv_duration
	hiv_duration	years			hiv_duration
	nadir_cd4_abs	xE9/L			nadir_cd4_abs
	TPV	mm3			TPV
	LAPV	mm3			LAPV
	CAC_total		Global calcium score
	HIV status		[1] Positive [2] Negative
	High/Low Plaque cut off 100		[1] High Plaque [2] Low Plaque
	CVD status		[1] Positive [2] Negative		CVD status
	HIV status- High/Low Plaque cut off 100		[1] HIV+ High Plaque [2] HIV+ Low Plaque [3] HIV- High Plaque [4] HIV- Low Plaque
	Co-infection CMV		[+] IgG positive at baseline		Co-infection CMV
	Co-infection HCV		[+] Anti-HCV positive at baseline
